# Supplementary material
Source: PubMed Central journal article supplement (PMC6960475)
Supplement: baADV2019000561-suppl1.pdf [file baADV2019000561-suppl1.pdf]

[Data File Name ] Data Dictionary

| Variable Name      | Variable Label                                                                                                                                  | Variable Type |
|--------------------|-------------------------------------------------------------------------------------------------------------------------------------------------|---------------|
| STUDY_ID           | Study ID                                                                                                                                        | Num           |
| GENDER             | Gender                                                                                                                                          | Num           |
| RACE               | Race                                                                                                                                            | Num           |
| AGE                | Age of patient at time of Deep Vein Thrombosis                                                                                                  | Num           |
| DVT_DXDT           | Deep Vein Thrombosis Diagnosis Date                                                                                                             | Date          |
| WT_BEFORE          | Weight recorded before Deep Vein Thrombosis Diagnosis Date                                                                                      | Num           |
| WT_BEFORE_IND      | Date difference between Deep Vein Thrombosis Diagnosis and Weight Before date (DVT_DXDT - WT_BEFORE date)                                       | Num           |
| WT_AFTER           | Weight recorded after Deep Vein Thrombosis Diagnosis Date                                                                                       | Num           |
| WT_AFTER_IND       | Date difference between Deep Vein Thrombosis Diagnosis and Weight After date (DVT_DXDT - WT_AFTER date)                                         | Num           |
| RECURRENT          | Has this patient had a Deep Vein Thrombosis in the past?                                                                                        | Num           |
| RECURRENT_DT       | Date different between first Deep Vein Thrombosis and Recurrent Deep Vein Thrombosis (DVT_DXDT - RECURRENT_DT date)                             | Num           |
| METABOLICSYN_IND   |                                                                                                                                                 | Num           |
| METABOLICSYN_DT    | Date difference between deidentified Deep Vein Thrombosis date and closest Metabolic Syndrome diagnosis date (DVT_DXDT = METABOLICSYN_DX date). | Char          |
| HYPERTENSION_IND   |                                                                                                                                                 | Num           |
| HYPERTENSION_DT    | Date difference between deidentified Deep Vein Thrombosis date and closest Hypertension diagnosis (DVT_DXDT - HYPERTENSION_DX date)             | Char          |
| HYPERLIPIDEMIA_IND |                                                                                                                                                 | Num           |
| HYPERLIPIDEMIA_DT  | Date difference between deidentified Deep Vein Thrombosis date and closest Hyperlipidemia diagnosis (DVT_DXDT - HYPERLIPIDEMIA_DX date)         | Char          |
| DIABETESII_IND     |                                                                                                                                                 | Num           |
| DIABETESII_DT      | Date difference between deidentified Deep Vein Thrombosis date and closest Type 2 Diabetes diagnosis (DVT_DXDT - DIABETES_IIDX date)            | Char          |
| OBESITY_IND        |                                                                                                                                                 | Num           |
| OBESITY_DT         | Date difference between deidentified Deep Vein Thrombosis date and closest Obesity diagnosis (DVT_DXDT - OBESITY_DX date)                       | Char          |
| AFIB_IND           | Atrial Fibrillation/Flutter Indicator                                                                                                           | Num           |
| AFIB_DT            | Date difference between Deep Vein Thrombosis Diagnosis and Atrial Fibrillation diagnosis (DVT_DXDT - AFIB_DT date)                              | Char          |
| COPD_IND           | COPD Indicator                                                                                                                                  | Num           |

[Data File Name ] Data Dictionary

|                  |                                                                                                                      |      |
|------------------|----------------------------------------------------------------------------------------------------------------------|------|
| COPD_DT          | Date difference between Deep Vein Thrombosis Diagnosis and Atrial Fibrillation diagnosis (DVT_DXDT - COPD_DT date)   | Char |
| HF_IND           | Heart Failure Indicator                                                                                              | Num  |
| HF_DT            | Date difference between Deep Vein Thrombosis Diagnosis and Heart Failure diagnosis (DVT_DXDT - HF_DT date)           | Char |
| ANXIETY_IND      | Anxiety Indicator                                                                                                    | Num  |
| ANXIETY_DT       | Date difference between Deep Vein Thrombosis Diagnosis and Anxiety diagnosis (DVT_DXDT - ANXIETY_DT date)            | Char |
| DEPRESSION_IND   | Depression Indicator                                                                                                 | Num  |
| DEPRESSION_DT    | Date difference between Deep Vein Thrombosis Diagnosis and Depression diagnosis (DVT_DXDT - DEPRESSION_DT date)      | Char |
| STROKE_IND       | Stroke Indicator                                                                                                     | Num  |
| STROKE_DT        | Date difference between Deep Vein Thrombosis Diagnosis and Stroke diagnosis (DVT_DXDT - STROKE_DT date)              | Char |
| MI_IND           | Myocardial Infarction Indicator                                                                                      | Num  |
| MI_DT            | Date difference between Deep Vein Thrombosis Diagnosis and Myocardial Infarction diagnosis (DVT_DXDT - MI_DT date)   | Char |
| GIBLEED_IND      | Gastrointestinal Bleed Indicator                                                                                     | Num  |
| GIBLEED_DT       | Date difference between Deep Vein Thrombosis Diagnosis and Gastrointestinal Bleed date (DVT_DXDT - GIBLEED_DT date)  | Char |
| INTRACRANIAL_IND | Intracranial Hemorrhage Indicator                                                                                    | Num  |
| INTRACRANIAL_DT  | Date difference between Deep Vein Thrombosis Diagnosis and Intracranial Hemorrhage date (DVT_DXDT - GIBLEED_DT date) | Char |
| SMOKER           | Smoker: Y or N                                                                                                       | Num  |
| ORIG_DEATH_IND   | Death indicator                                                                                                      | Num  |
| ORIG_DEATH_DT    | Date difference between Deep Vein Thrombosis Diagnosis and death date (DVT_DXDT - DEATH_DT date)                     | Char |
| UPD_DEATH_IND    | Death indicator after instituting control to omit as many wrong death dates as possible                              | Num  |
| UPD_DEATH_DT     | Date difference between Deep Vein Thrombosis Diagnosis and death date (DVT_DXDT - UPD_DEATH_DT date)                 | Char |
| CKD_IND          | Chronic Kidney Disease Indicator                                                                                     | Num  |
| CKD_DT           | Date difference between Deep Vein Thrombosis Diagnosis and CKD diagnosis (DVT_DXDT - CKD_DT date)                    | Char |
| BREASTCX_IND     | Breast Cancer Indicator                                                                                              | Num  |

[Data File Name ] Data Dictionary

|                   |                                                                                                                     |      |
|-------------------|---------------------------------------------------------------------------------------------------------------------|------|
| BREASTCX_DT       | Date difference between Deep Vein Thrombosis Diagnosis and Breast Cancer diagnosis (DVT_DXDT - BREASTCX_DT date)    | Char |
| ESOPHCX_IND       | Esophageal Cancer Indicator                                                                                         | Num  |
| ESOPHCX_DT        | Date difference between Deep Vein Thrombosis Diagnosis and Esophageal Cancer diagnosis (DVT_DXDT - ESOPHCX_DT date) | Char |
| LUNGCX_IND        | Lung Cancer Indicator                                                                                               | Num  |
| LUNGCX_DT         | Date difference between Deep Vein Thrombosis Diagnosis and Lung Cancer diagnosis (DVT_DXDT - LUNGCX_DT date)        | Char |
| LIVERCX_IND       | Liver Cancer Indicator                                                                                              | Num  |
| LIVERCX_DT        | Date difference between Deep Vein Thrombosis Diagnosis and Liver Cancer diagnosis (DVT_DXDT - LIVERCX_DT date)      | Char |
| TESTICX_IND       | Testicular Cancer Indicator                                                                                         | Num  |
| TESTICX_DT        | Date difference between Deep Vein Thrombosis Diagnosis and Testicular Cancer diagnosis (DVT_DXDT - TESTICX_DT date) | Char |
| PANCCX_IND        | Pancreatic Cancer Indicator                                                                                         | Num  |
| PANCCX_DT         | Date difference between Deep Vein Thrombosis Diagnosis and Pancreatic Cancer diagnosis (DVT_DXDT - PANCCX_DT date)  | Char |
| PROSTCX_IND       | Prostate Cancer Indicator                                                                                           | Num  |
| PROSTCX_DT        | Date difference between Deep Vein Thrombosis Diagnosis and Prostate Cancer diagnosis (DVT_DXDT - PROSTCX_DT date)   | Char |
| OVARCX_IND        | Ovarian Cancer Indicator                                                                                            | Num  |
| OVARCX_DT         | Date difference between Deep Vein Thrombosis Diagnosis and Ovarian Cancer diagnosis (DVT_DXDT - OVARCX_DT date)     | Char |
| MELANCX_IND       | Melanoma Indicator                                                                                                  | Num  |
| MELANCX_DT        | Date difference between Deep Vein Thrombosis Diagnosis and Melanoma diagnosis (DVT_DXDT - MELANCX_DT date)          | Char |
| ED_VISITS         | Count of Emergency Department visits from Index Date to 2 years after                                               | Num  |
| PE_IND            | Indicates whether a Study ID is also in the PE Cohort                                                               | Num  |
| ANTIHYPERTENS_RX  | Blood Pressure Medications                                                                                          | Num  |
| ANTILIPID_RX      | Lipid Lowering Medications                                                                                          | Num  |
| TYPE2DIAB_RX      | Type 2 Diabetes Medications                                                                                         | Num  |
| ANTINEOPLASTIC_RX | Antineoplastic Medications                                                                                          | Num  |
| ANTIAX_RX         | Anxiety Medications                                                                                                 | Num  |
| ANTIPSYCH_RX      | Antipsychotic Medications                                                                                           | Num  |
| ANTIDEPRESSANT_RX | Antidepressant Medications                                                                                          | Num  |
| CENSOR_DT         | Censor Date                                                                                                         | Num  |

[Data File Name ] Data Dictionary

|              |                                                                             |     |
|--------------|-----------------------------------------------------------------------------|-----|
| IMAGING_HOSP | Count of imaging procedures within +/- 6 months of DVT_DXDT from a hospital | Num |
| IMAGING_INS  | Count of imaging procedures within +/- 6 months of DVT_DXDT from a payor    | Num |
| EKGEF        | Ejection Fraction closest to DVT_DXDT                                       | Num |
| EKGEF_DT     | EKG Date difference                                                         | Num |

[Data File Name ] Data Dictionary

| Variable Description / Coded Values                                                                                                                    |
|--------------------------------------------------------------------------------------------------------------------------------------------------------|
| Study ID                                                                                                                                               |
| 0 = Female   1 = Male   Null = Unknown                                                                                                                 |
| 1 = White   2 = Black   3 = Hispanic   4 = Asian/Pacific/Hawaiian   5 = Native American/Alaskan   6 = Other   7 = Unknown                              |
| Age of Patient at the time of the Deep Vein Thrombosis. Those aged 90+ have been deidentified as per policy.                                           |
| ICD codes include 453.* and I82.*                                                                                                                      |
| Measured in pounds (lbs)                                                                                                                               |
| Measured in days                                                                                                                                       |
| Measured in pounds (lbs)                                                                                                                               |
| Measured in days                                                                                                                                       |
| 1 = Yes   0 = No                                                                                                                                       |
| Measured in days                                                                                                                                       |
| 1 = Positive   0 = Negative                                                                                                                            |
| ICD Codes include E88.81 and 277.7; Measured in days                                                                                                   |
| 1 = Positive   0 = Negative                                                                                                                            |
| ICD codes include 401.*, 402.*, 403.*, 404.*, I10.*, I11.*, I12.*, I13.*; Measured in days                                                             |
| 1 = Positive   0 = Negative                                                                                                                            |
| ICD codes include 272.*, E78.*, E88.1; Measured in days                                                                                                |
| 1 = Positive   0 = Negative                                                                                                                            |
| ICD Codes include 250.X0, 250.X2, E11.* (any diagnosis code that starts with 250. and ends with 0 or 2 indicate Type II Diabetes dx); Measured in days |
| 1 = Positive   0 = Negative                                                                                                                            |
| ICD Codes include 278.* and E66.*; Measured in days                                                                                                    |
| 1 = Positive   0 = Negative                                                                                                                            |
| ICD Codes include 427.3, 427.31, 427.32, I48.*; Measured in days                                                                                       |
| 1 = Positive   0 = Negative                                                                                                                            |

[Data File Name ] Data Dictionary

|                                                                                                                                                                                                                                                                                                                                                                                                               |
|---------------------------------------------------------------------------------------------------------------------------------------------------------------------------------------------------------------------------------------------------------------------------------------------------------------------------------------------------------------------------------------------------------------|
| ICD Codes include 496, 491.*, 492.*, J41.*, J42, J43.*, J44.*; Measured in days                                                                                                                                                                                                                                                                                                                               |
| 1 = Positive   0 = Negative                                                                                                                                                                                                                                                                                                                                                                                   |
| ICD Codes include 398.91, 402.01, 402.11, 402.91, 404.01, 404.03, 404.11, 404.13, 404.91, 404.93, 428.*, I09.81, I11.0, I13.0, I13.2, I50.*; Measured in days                                                                                                                                                                                                                                                 |
| 1 = Positive   0 = Negative                                                                                                                                                                                                                                                                                                                                                                                   |
| ICD Codes include 300.02 and F41.1; Measured in days                                                                                                                                                                                                                                                                                                                                                          |
| 1 = Positive   0 = Negative                                                                                                                                                                                                                                                                                                                                                                                   |
| ICD Codes include 296.2*, 296.3*, 296.82, 311, F32.*, and F33.*; Measured in days                                                                                                                                                                                                                                                                                                                             |
| 1 = Positive   0 = Negative                                                                                                                                                                                                                                                                                                                                                                                   |
| ICD Codes include 434.01, 434.11, 434.91, 435.*, and I63.*; Measured in days                                                                                                                                                                                                                                                                                                                                  |
| 1 = Positive   0 = Negative                                                                                                                                                                                                                                                                                                                                                                                   |
| ICD Codes include 434.01, 434.11, 434.91, 435.*, and I63.*; Measured in days                                                                                                                                                                                                                                                                                                                                  |
| 1 = Positive   0 = Negative                                                                                                                                                                                                                                                                                                                                                                                   |
| ICD Codes include 530.82, 531.0*, 531.2*, 531.4*, 531.6*, 532.0*, 532.2*, 532.4*, 532.6*, 533.0*, 533.2*, 533.4*, 533.6*, 534.0*, 534.2*, 534.4*, 534.6*, 535.11, 535.21, 535.31, 535.41, 535.51, 535.61, 535.71, 537.83, 537.84, 562.02, 562.03, 562.12, 562.13, 569.3, 569.85, 569.86, 578.*, K92.0, K92.1, K92.2, K29.01, K29.21, K29.31, K29.41, K29.51, K29.61, K29.71, K29.81, K29.91; Measured in days |
| 1 = Positive   0 = Negative                                                                                                                                                                                                                                                                                                                                                                                   |
| ICD Codes include 432.*, I61.*, and I62.*; Measured in days                                                                                                                                                                                                                                                                                                                                                   |
| 0 = No   1 = Yes   Null = Unknown                                                                                                                                                                                                                                                                                                                                                                             |
| 1 = Positive   0 = Negative; death data pulled from INPC only goes until 2015. Death data pulled from IU Health may not have a date associated with it and only a flag.                                                                                                                                                                                                                                       |
| Not always a death date in IU Health's Enterprise Data Warehouse                                                                                                                                                                                                                                                                                                                                              |
| 1 = Positive   0 = Negative; death data pulled from INPC only goes until 2015. Death data pulled from IU Health may not have a date associated with it and only a flag.                                                                                                                                                                                                                                       |
| Not always a death date in IU Health's Enterprise Data Warehouse                                                                                                                                                                                                                                                                                                                                              |
| 1 = Positive   0 = Negative                                                                                                                                                                                                                                                                                                                                                                                   |
| ICD Codes include 403.1, 403.9, 404.0, 404.1, 404.9, 585.2, 585.3, 585.4, 585.5, 585.6, 585.9, N18.2, N18.3, N18.4, N18.5, N18.6, N18.9, I12.*, I13.*; Measured in days                                                                                                                                                                                                                                       |
| 1 = Positive   0 = Negative                                                                                                                                                                                                                                                                                                                                                                                   |

[Data File Name ] Data Dictionary

ICD Codes include 174.\*, 175.\*, C50.\*; Measured in days

1 = Positive | 0 = Negative

ICD Codes include 150.\*, C15.\*; Measured in days

1 = Positive | 0 = Negative

ICD Codes include 162.\*, C34.\*; Measured in days

1 = Positive | 0 = Negative

ICD Codes include 155.\*, C22.\*; Measured in days

1 = Positive | 0 = Negative

ICD Codes include 186.\*, C62.\*; Measured in days

1 = Positive | 0 = Negative

ICD Codes include 157.\*, C25.\*; Measured in days

1 = Positive | 0 = Negative

ICD Codes include 185, C61; Measured in days

1 = Positive | 0 = Negative

ICD Codes include 183.\*, C56.\*; Measured in days

1 = Positive | 0 = Negative

ICD codes include 172.\*, 173.\*, C43.\*; Measured in days

Number of emergency department encounters 2 years after DVT\_DXDT

1 = PE Diagnosis | Null = No PE Diagnosis

See Medications tab for a list of all GPI Codes associated with antihypertension medications

See Medications tab for a list of all GPI Codes associated with antihyperlipidemic medications

See Medications tab for a list of all GPI Codes associated with diabetic medications

See Medications tab for a list of all GPI Codes associated with antineoplastic medications

See Medications tab for a list of all GPI Codes associated with antianxiety medications

See Medications tab for a list of all GPI Codes associated with antipsychotic medications

See Medications tab for a list of all GPI Codes associated with antidepressant medications

Last encounter date in INPC or IU Health for the patient

[Data File Name ] Data Dictionary

Number of days where a radiology CPT code like 7\*\*\*\* is reported. Unable to pull distinct count of procedures because different sources use different methods of naming their procedures.

Number of days where a radiology CPT code like 7\*\*\*\* is reported. Unable to pull distinct count of procedures because different sources use different methods of naming their procedures.

Pull the Ejection Fraction closest to the index date based on Patient's text notes in nDepth, Regenstrief's high-speed text-mining platform

Date difference between Ejection Fraction date closest to DVT\_DXDT and DVT\_DXDT
